# Supplementary material for: Cocktail of chemical compounds robustly promoting cell reprogramming protects liver against acute injury
Source: PubMed Central journal article supplement (PMC5359186; doi:10.1007/s13238-017-0373-y), 2017-02-11
Supplement: 13238_2017_373_MOESM1_ESM.pdf [file 13238_2017_373_MOESM1_ESM.pdf]

## **Supplementary data**

# **Cocktail of Chemical Compounds Robustly Promoting Cell Reprogramming Protects Liver against Acute Injury**

Yuewen Tang, Lin Cheng

## Supplementary Figure 1

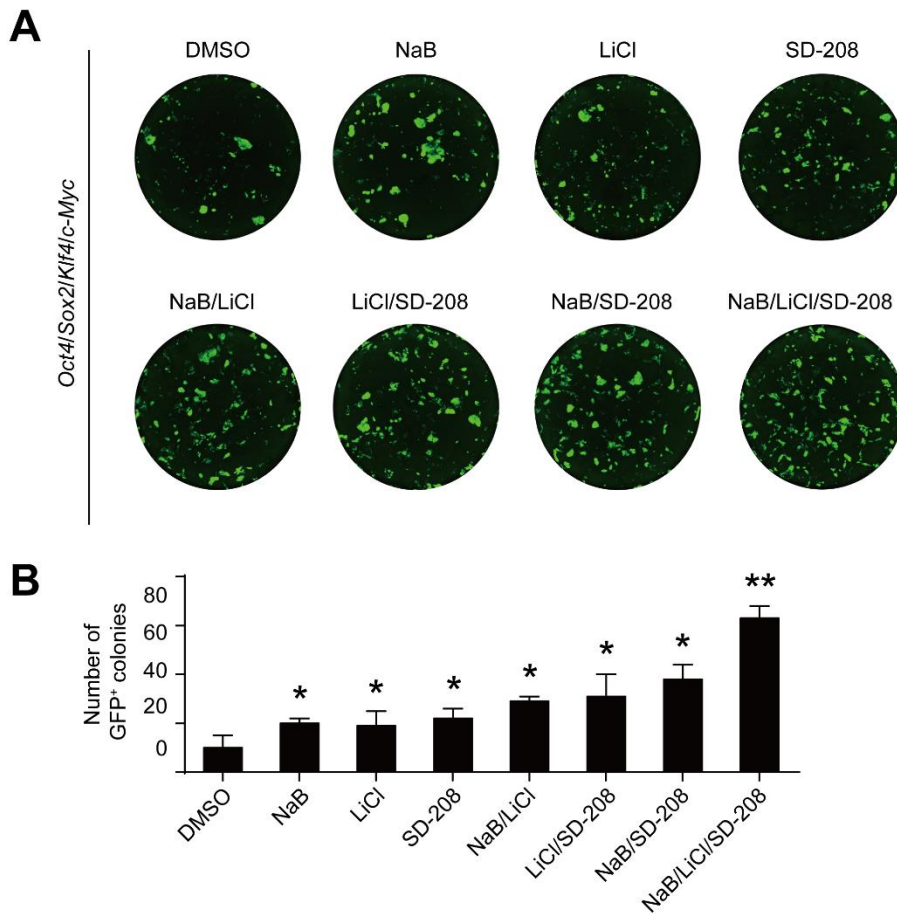

### Supplementary Figure 1. Chemical compounds promote cell reprogramming *in vitro*.

(A) Generation of pluripotent stem cell from Yamanaka factors-induced OG2-MEFs under treatment of diverse chemical compounds. Images of GFP<sup>+</sup> colonies were taken on day 10 post-infection. NaB, 0.5 mmol/L. LiCl, 1 mmol/L. SD-208, 1  $\mu$ mol/L. (B) Quantification of GFP<sup>+</sup> colonies in (A). All figures are representative of three independent experiments (n = 3). All data are presented as mean  $\pm$  SD. \* $P$ <0.05, \*\* $P$ <0.01 vs. DMSO.

## Supplementary Figure 2

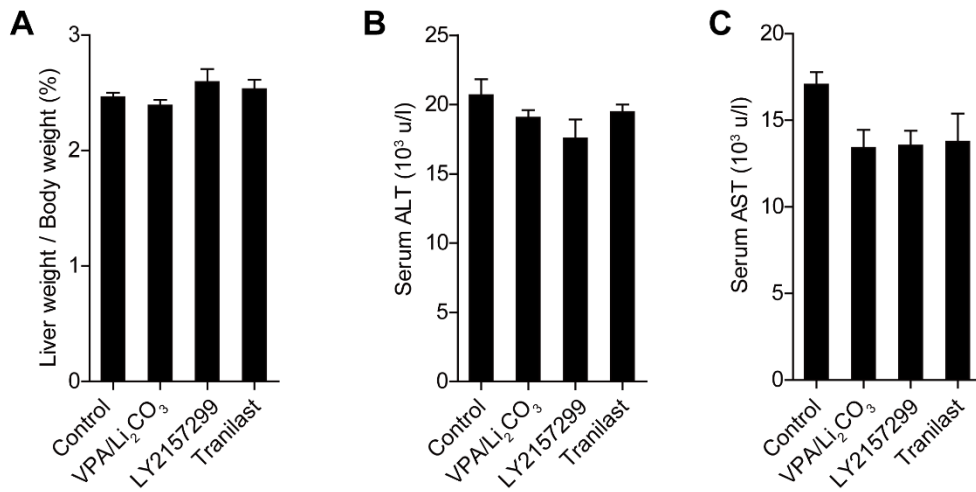

### Supplementary Figure 2. Protecting effect of chemical compounds on acute liver injuries.

(A) Assessment of liver regeneration treated with diverse chemicals as indicated 48 hours after PHx by measuring ratio between liver weight and body weight. (B and C) Serum alanine transaminase (ALT) activity and aspartate transaminase (AST) activity were analyzed 24 hours post CCl<sub>4</sub> treatment. All data are presented as mean  $\pm$  SD.

### Supplementary Figure 3

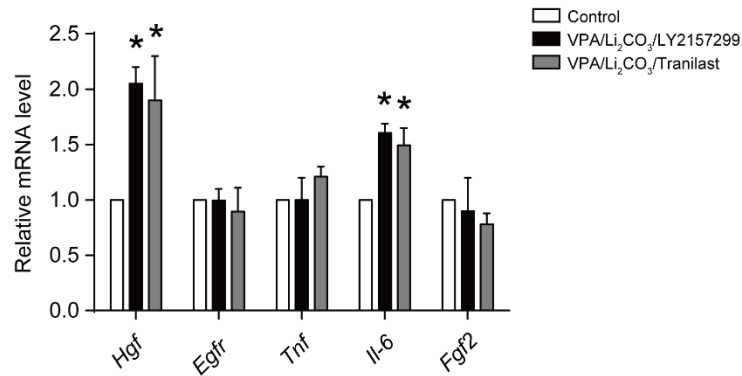

**Supplementary Figure 3.** Expression level of the genes playing important roles in liver regeneration was analyzed by qRT-PCR, 6 hours after treatment with diverse drug cocktails in mouse model of partial hepatectomy. Hepatocyte growth factor (*Hgf*), epidermal growth factor receptor (*Egfr*), tumor necrosis factor (*Tnf*), interleukin-6 (*Il-6*) and fibroblast growth factor 2 (*Fgf2*). All data are presented as mean  $\pm$  SD. \* $P < 0.05$  vs. control.

Supplementary Table 1. Primer sets for qRT-PCR

| Mouse gene   | Sequence (5' → 3') |                         |
|--------------|--------------------|-------------------------|
| <i>Oct4</i>  | Forward            | TCTTTCCACCAGGCCCCCGGCTC |
|              | Reverse            | TGCGGGCGGACATGGGGAGATCC |
| <i>Sox2</i>  | Forward            | CTGGACTGCGAACTGGAGAAG   |
|              | Reverse            | TTTGCACCCCCTCCCAATTC    |
| <i>Klf4</i>  | Forward            | TTGCGGTAGTGCCTGGTCAGTT  |
|              | Reverse            | CTATGCAGGCTGTGGCAAACCC  |
| <i>c-Myc</i> | Forward            | GGAGTGGTTCAGGATTGGGG    |
|              | Reverse            | GGGTAGCTTACCAGAGTCGC    |
| <i>Hgf</i>   | Forward            | GGTTACAGGGGAACCAGCAA    |
|              | Reverse            | ATTCCCCGTGTAGCACCAAG    |
| <i>Egfr</i>  | Forward            | TCACCCAACTGGGCACTTTT    |
|              | Reverse            | ACGACAGCGATGGGAACATT    |
| <i>Tnf</i>   | Forward            | TGTCTACTCCTCAGAGCCCC    |
|              | Reverse            | GACCCGTAGGGCGATTACAG    |
| <i>Il-6</i>  | Forward            | CCAGTTGCCTTCTTGGGACT    |
|              | Reverse            | GTCTCCTCTCCGGACTTGTG    |
| <i>Fgf2</i>  | Forward            | CGTTGTACACTCAAGGGGCT    |
|              | Reverse            | GTCCCGTTTTGGATCCGAGT    |
| <i>Hprt</i>  | Forward            | AGTCCCAGCGTCGTGATTAG    |
|              | Reverse            | TTTCCAAATCCTCGGCATAATGA |
